# Supplementary material
Source: publisher site journal article supplement (https://www.dovepress.com/article/345328)
Supplement: Supplementary file 1 [file get_supplementary_file.php]

| **Supplementary Table 1. the results of post hoc analysis of different features** | | | | | |
| --- | --- | --- | --- | --- | --- |
|  | Combined feature | FA feature | MD feature | AD feature | RD feature |
| Combined feature | / | <0.001/ <0.001 | 0.23/0.32 | <0.001/ <0.001 | <0.001/ <0.001 |
| FA feature | <0.001/ <0.001 | / | <0.01/<0.01 | 0.13/0.34 | 0.11/0.20 |
| MD feature | 0.23/0.32 | 0.01/<0.01 | / | <0.001/ <0.001 | <0.001/ <0.001 |
| AD feature | <0.001/ <0.001 | 0.13/0.34 | <0.001/ <0.001 | / | 0.94/0.75 |
| RD feature | <0.001/ <0.001 | 0.11/0.20 | <0.001/ <0.001 | 0.94/0.75 | / |
| Note. Data are *Paccuracy/Pauc* unless otherwise noted. | | | | | |
